# Supplementary material for: Impact of Annealing Temperature on the Morphological, Optical and Photoelectrochemical Properties of Cauliflower-like CdSe0.6Te0.4 Photoelectrodes; Enhanced Solar Cell Performance
Source: MDPI journal article supplement (doi:10.3390/ijms222111610), 2021-10-27
Supplement: s1 [file s1]

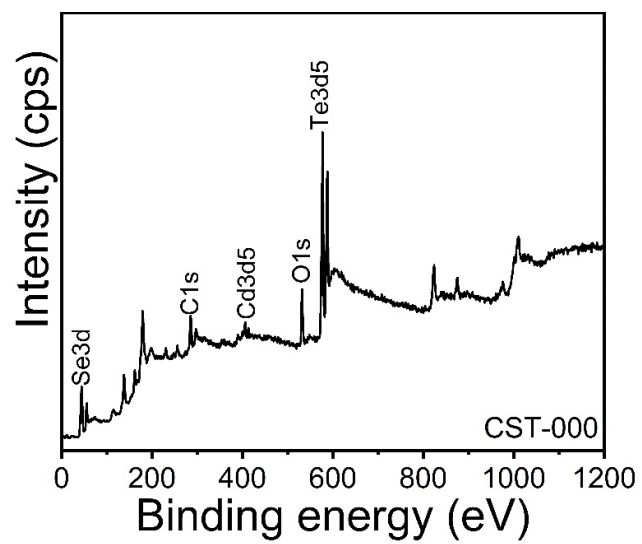

**Figure S1.** Survey spectrum of as-synthesized  $\text{CdSe}_{0.6}\text{Te}_{0.4}$  thin films prepared via electrochemical method.
